# Supplementary material for: Targeting melanoma’s MCL1 bias unleashes the apoptotic potential of BRAF and ERK1/2 pathway inhibitors
Source: PubMed Central journal article supplement (PMC6856071; doi:10.1038/s41467-019-12409-w), 2019-11-14
Supplement: 41467_2019_12409_MOESM3_ESM.pdf [file 41467_2019_12409_MOESM3_ESM.pdf]

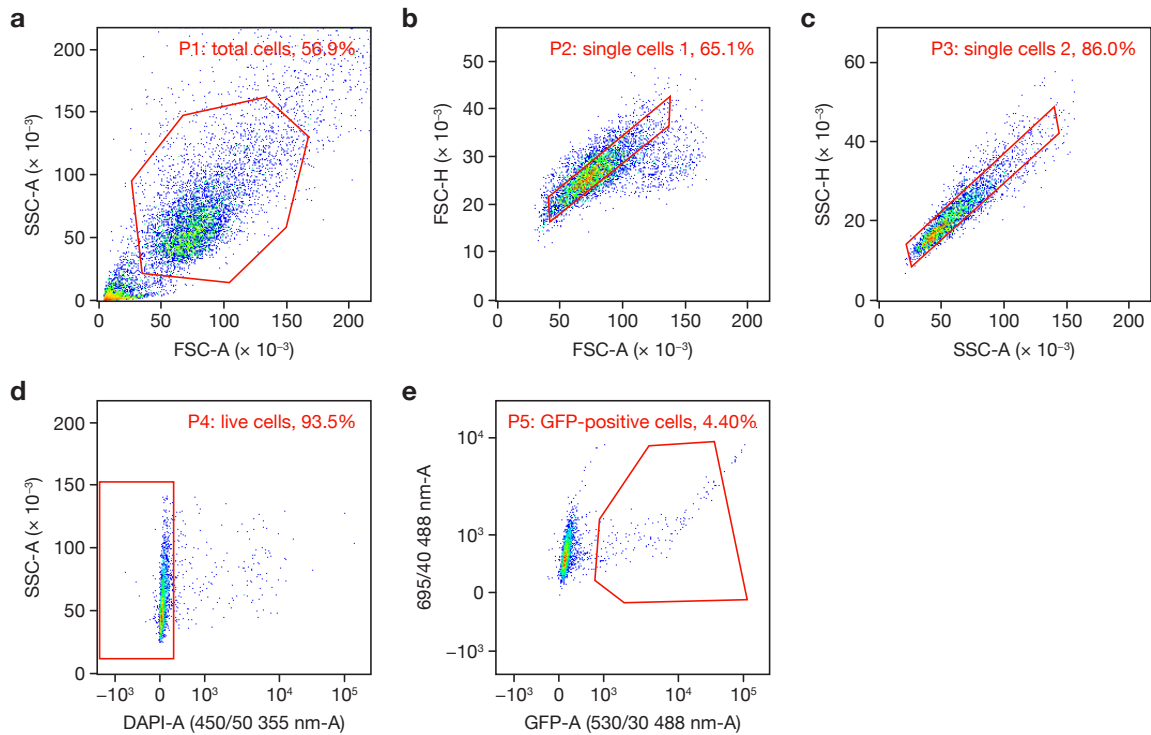

**Supplementary Data 1.** Flow cytometry gating strategy for sorting of GFP-positive cells in CRISPR experiments. **(a-e)** SK-MEL-30 cells were transfected with the *BCL2L11* and *BMF* gRNA containing Cas9 plasmids for 48 hours before single GFP-positive live cells were sorted by flow cytometry. Cells were first gated on forward scatter area (FSC-A) versus side scatter area (SSC-A) to give population 1 (P1) that eliminated unwanted events at the extremities **(a)**, followed by FSC-A versus forward scatter height (FSC-H) (P2) **(b)** and then SSC-A versus side scatter height (SSC-H) (P3) **(c)** to isolate single cells. DAPI-negative viable cells were then gated (P4) **(d)** and from this population GFP-positive cells sorted **(e)**, using the lasers and filter sets indicated. Cellular autofluorescence (695/40 488 nm-A) was monitored in order to exclude apparent GFP-positive cells with high autofluorescence.
