# Supplementary material for: Targeting melanoma’s MCL1 bias unleashes the apoptotic potential of BRAF and ERK1/2 pathway inhibitors
Source: PubMed Central journal article supplement (PMC6856071; doi:10.1038/s41467-019-12409-w), 2019-11-14
Supplement: 41467_2019_12409_MOESM4_ESM.pdf [file 41467_2019_12409_MOESM4_ESM.pdf]

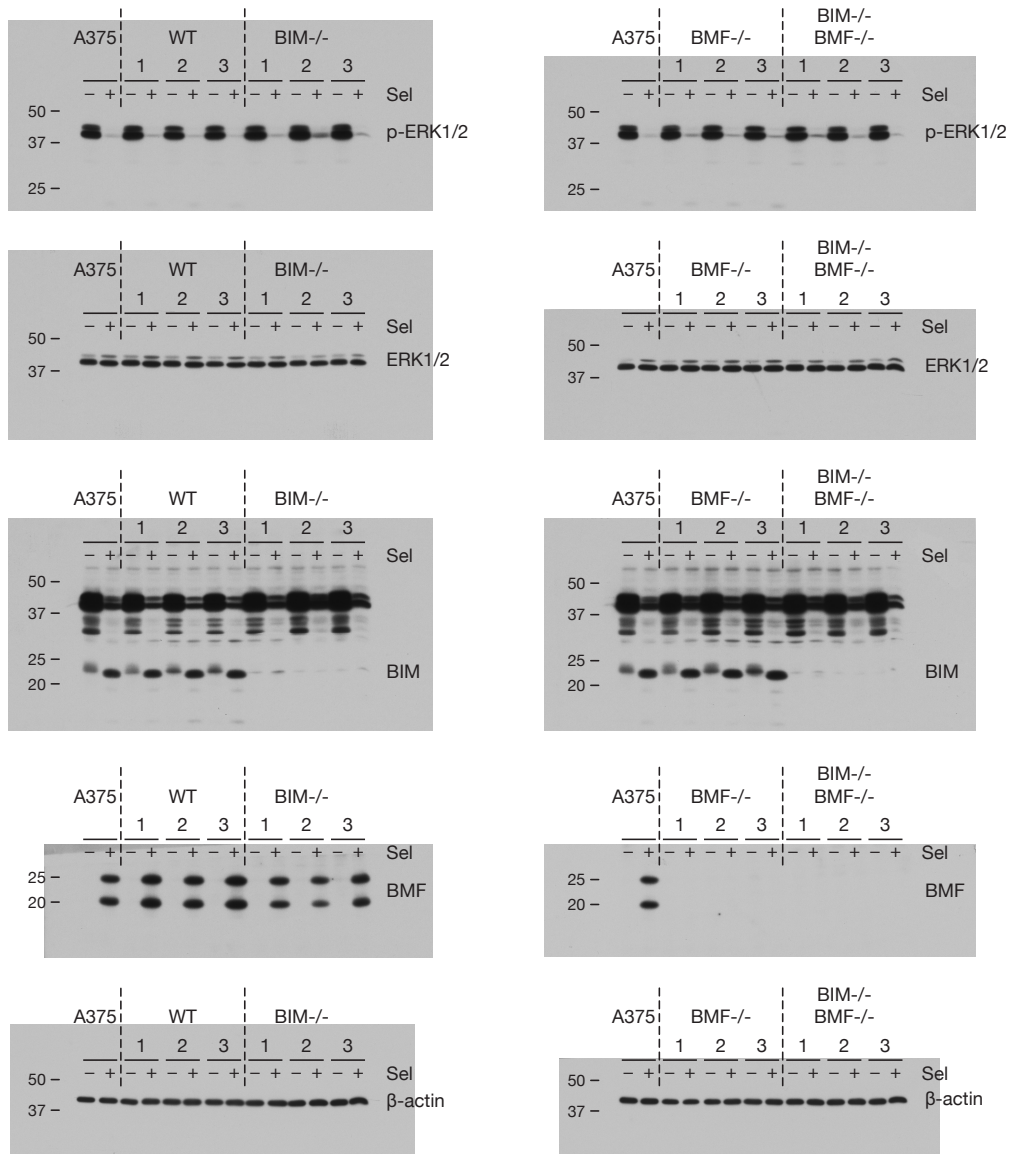

**Supplementary Data 2.** Uncropped western blot images of Figure 6e. A375 cells and three independent clonally derived WT, BIM and/ or BMF null A375 CRISPR clones were treated with 1  $\mu$ M selumetinib (Sel) as indicated for 24 hours and BIM and BMF expression assessed by western blotting. Images of uncropped membranes are shown.
